# Supplementary material for: Age Related Differences in Monocyte Subsets and Cytokine Pattern during Acute COVID-19—A Prospective Observational Longitudinal Study
Source: MDPI journal article supplement (doi:10.3390/cells10123373), 2021-11-30
Supplement: s1 [file s1]

## Supplementary Figures:

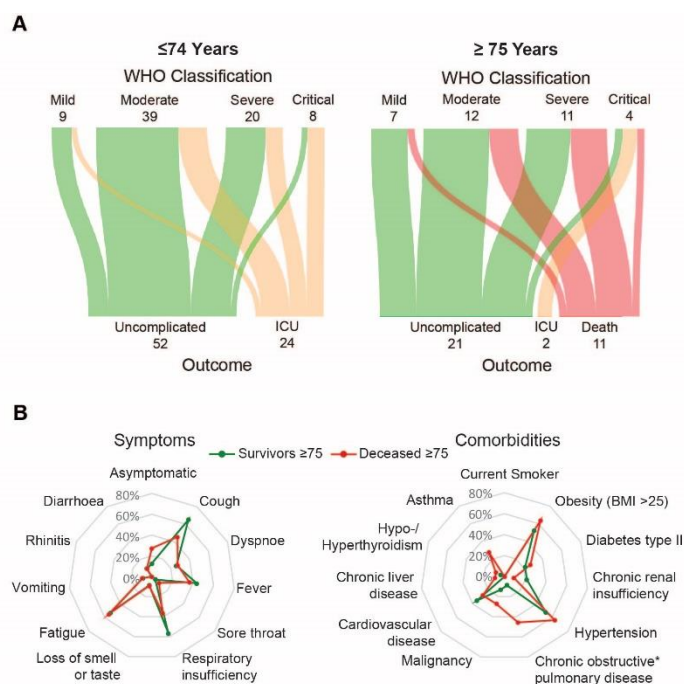

**Supplementary Figure S1: Disease severity, outcome, symptoms and comorbidities of young and elderly COVID-19 patients:** A) Sankey diagram visualizing WHO disease severity classification at admittance and clinical outcome of COVID-19 patients below (left) and above (right) 75 years of age, B) Percentage of survived and diseased COVID-19 patients above 75 years of age having symptoms (left) or comorbidities (right).

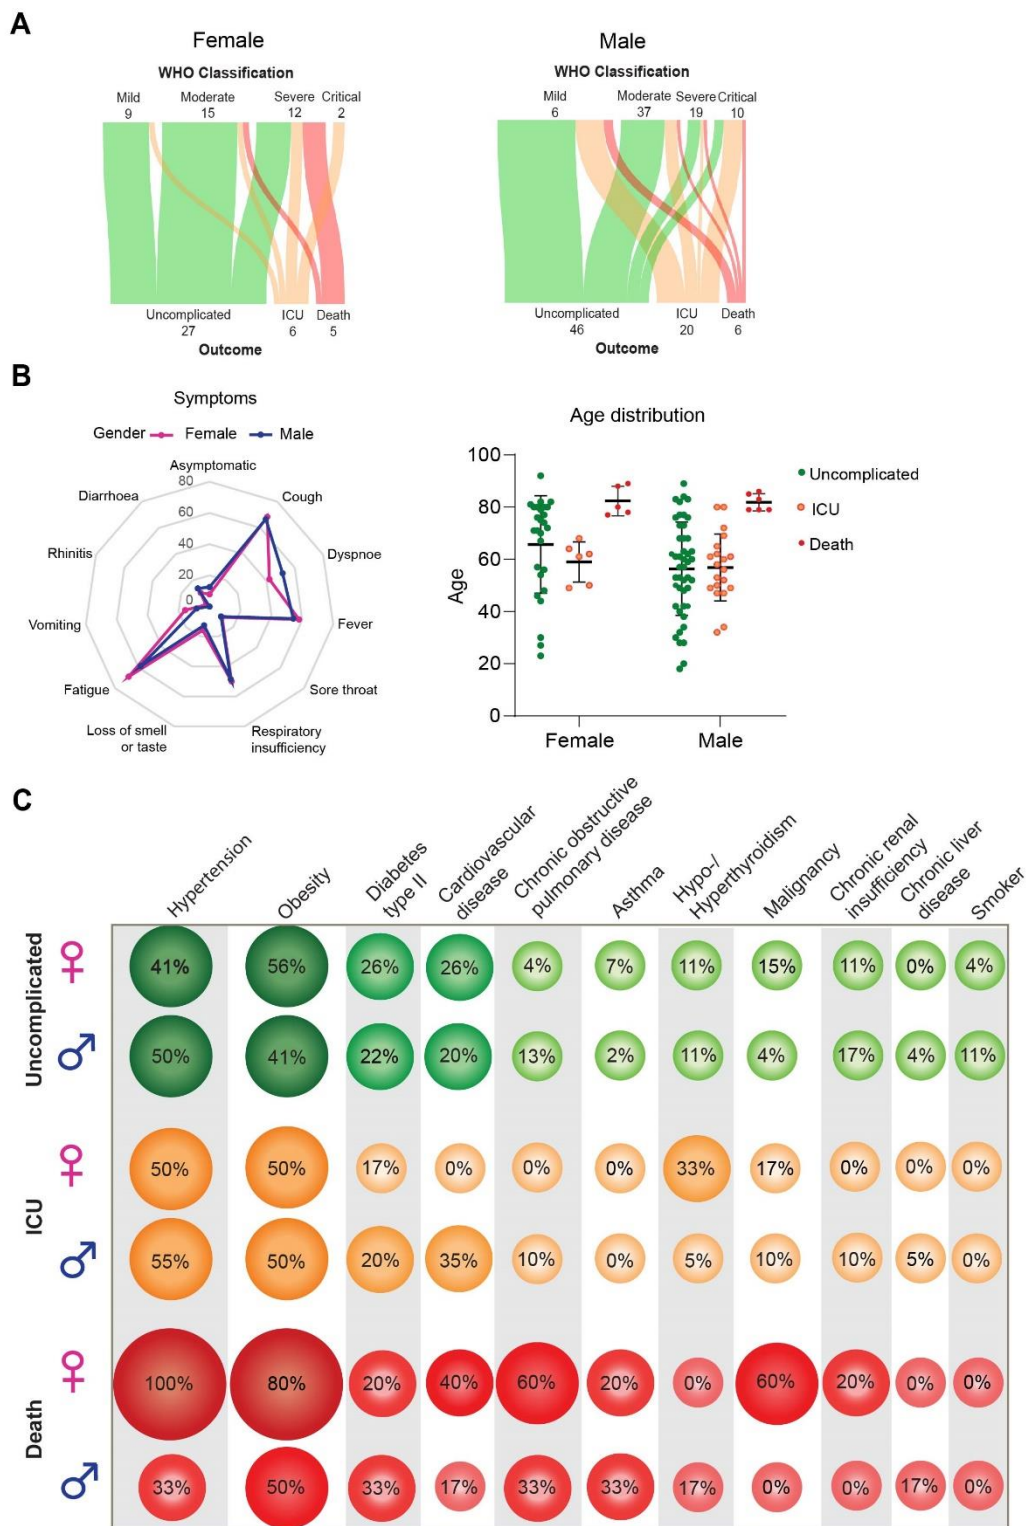

**Supplementary Figure S2: Disease severity, outcome, symptoms and comorbidities of female and male COVID-19 patients:** A) Sankey diagram visualizing WHO disease severity classification at admittance and clinical outcome of female (left) and male (right) COVID-19 patients, B) Percentage of symptoms experienced by COVID-19 patients (left) and the age distribution in the outcome groups (right) according to sex, C) The prevalence of comorbidities of female and male patients according to the clinical outcome groups.

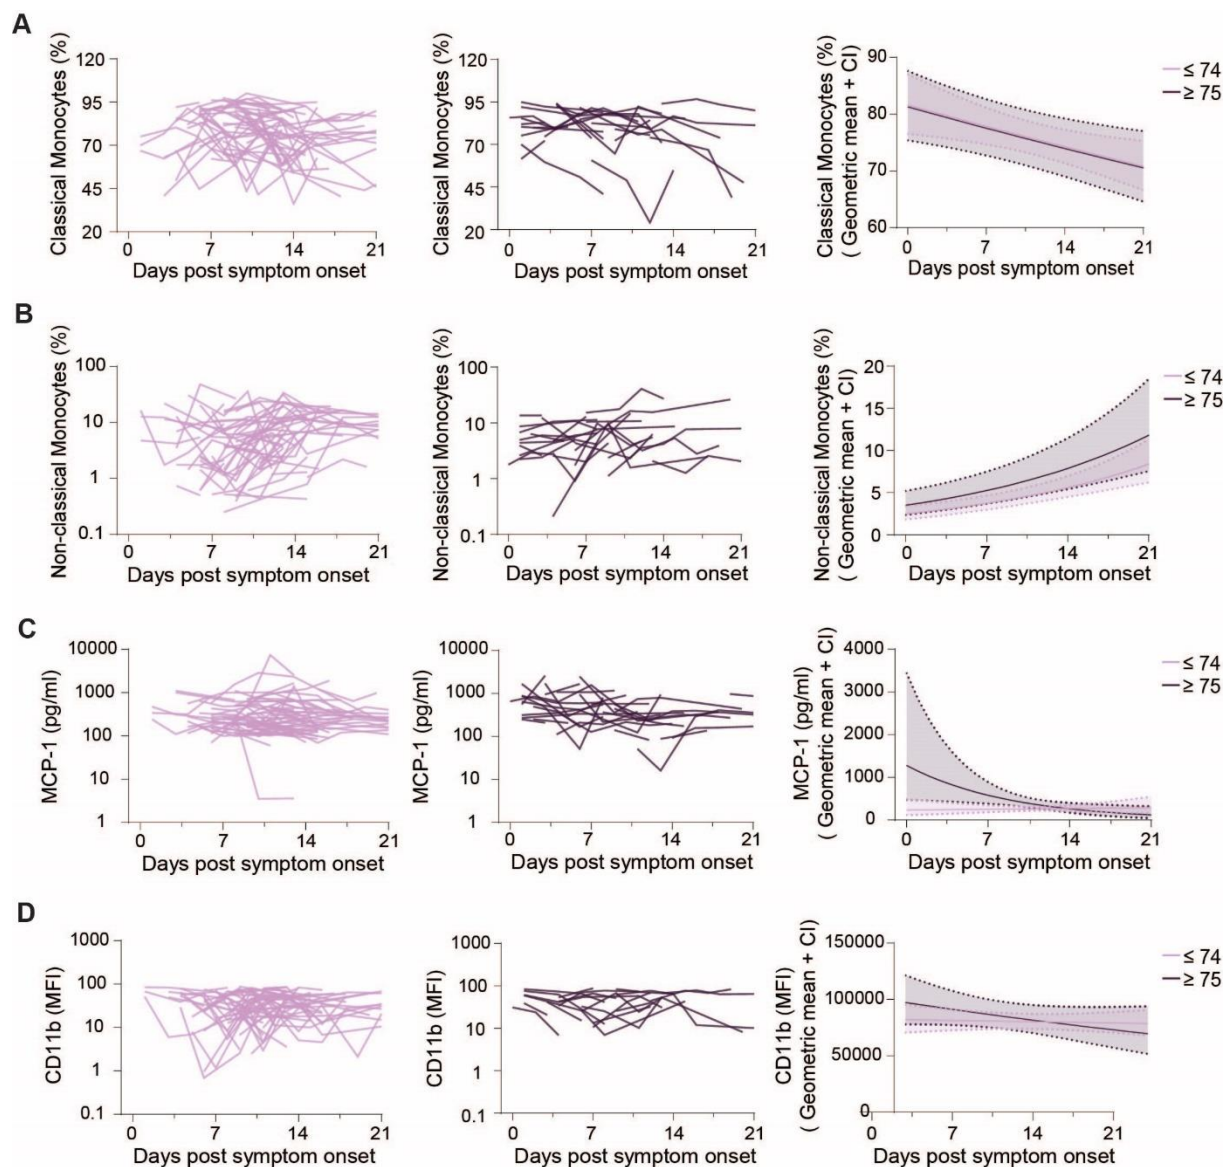

**Supplementary Figure S3: Frequencies of monocyte subsets and levels of monocyte activation markers in COVID-19 patients below and above 75 years of age over the disease course:** Raw values for individual COVID-19 patients below (left) or above (middle) 75 years of age and modelled values (right) of A) classical monocytes, B) non-classical monocytes, C) MCP-1 and D) activated CD11b.



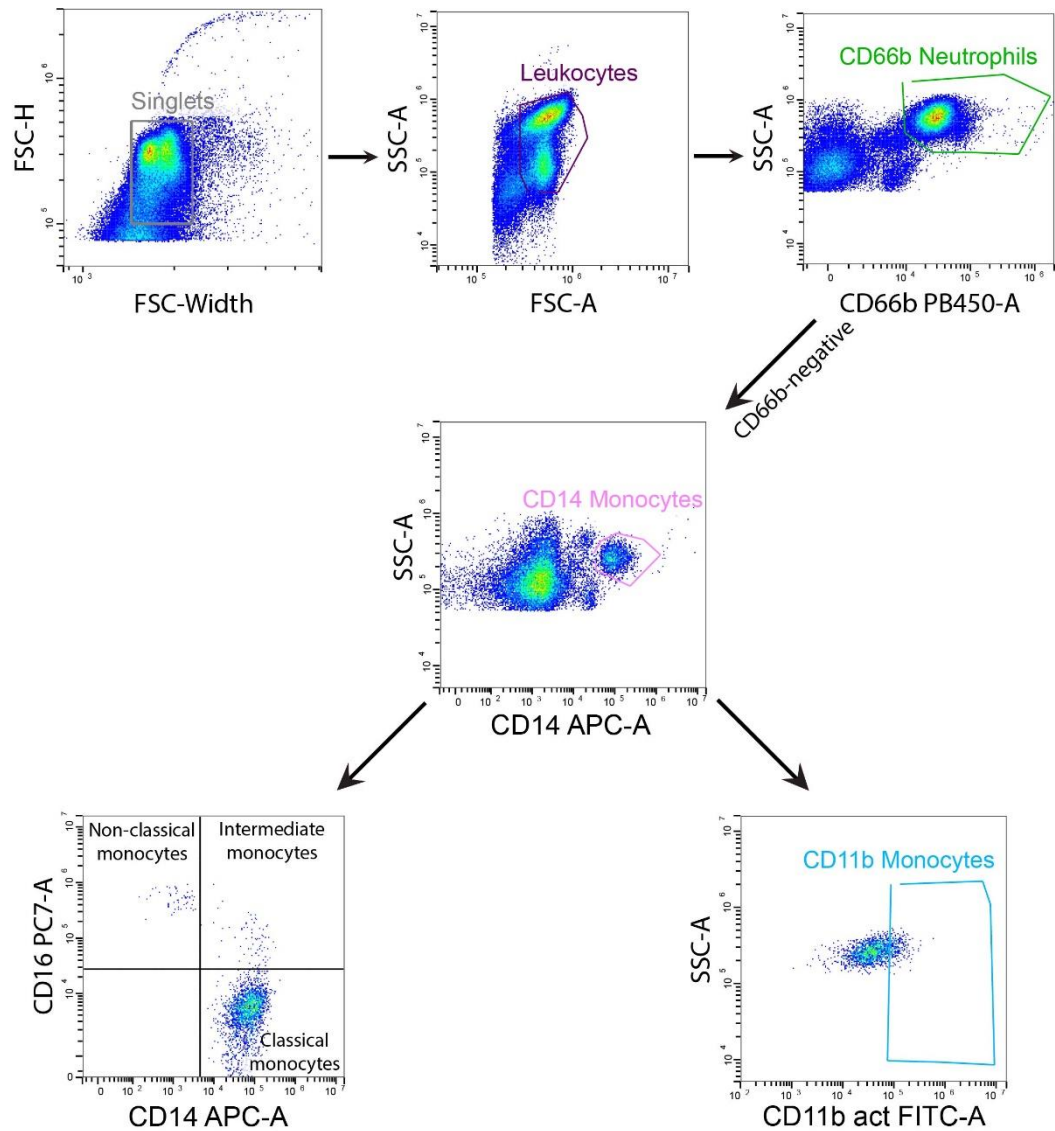

**Supplementary Figure S5: Gating strategy of flow cytometry data:** Monocytes were defined as being CD66b-negative and CD14-positive. Classical and non-classical monocyte subpopulations were analysed based on the expression of CD14 and CD16. Activated CD11b of monocytes was determined by quantifying the expression of CD11b on CD14-positive monocytes.



**Supplementary Table S1: Patient demographics and laboratory parameters at hospital admission**

| Parameter                                     | Missing Data<br>n | All<br>(n= 110)<br>n (%)<br>Median (IQR) | ≤ 74 Years<br>(n= 76)<br>n (%)<br>Median (IQR) | ≥ Years<br>(n= 34)<br>n (%)<br>Median (IQR) | p-Value*            |
|-----------------------------------------------|-------------------|------------------------------------------|------------------------------------------------|---------------------------------------------|---------------------|
| <b>Sex</b>                                    |                   |                                          |                                                |                                             | <b>p = 0.023</b>    |
| Male                                          | -                 | 72 (65.5)                                | 55 (72.4)                                      | 17 (50.0)                                   |                     |
| Female                                        | -                 | 38 (34.5)                                | 21 (27.6)                                      | 17 (50.0)                                   |                     |
| <b>Comorbidities</b>                          |                   |                                          |                                                |                                             |                     |
| Current smoker                                | 32                | 6 (7.7)                                  | 6 (7.9)                                        | 0 (0.0)                                     | p = 0.110           |
| Obesity (BMI > 25)                            | 12                | 54 (55.1)                                | 35 (46.1)                                      | 19 (55.9)                                   | p = 0.179           |
| Diabetes type II                              | -                 | 25 (22.7)                                | 17 (22.4)                                      | 8 (23.5)                                    | p = 0.893           |
| Hypertension                                  | 1                 | 55 (50.5)                                | 36 (47.4)                                      | 19 (55.9)                                   | p = 0.327           |
| Cardiovascular disease (any)                  | -                 | 26 (23.6)                                | 15 (19.7)                                      | 11 (32.4)                                   | p = 0.150           |
| Coronary heart disease                        | -                 | 14 (12.7)                                | 9 (11.8)                                       | 5 (14.7)                                    | p = 0.677           |
| Chronic heart failure                         | -                 | 8 (7.3)                                  | 7 (9.2)                                        | 1 (2.9)                                     | p = 0.242           |
| Atrial fibrillation                           | -                 | 11 (10)                                  | 5 (6.6)                                        | 6 (17.6)                                    | p = 0.074           |
| Peripheral arterial disease                   | -                 | 6 (5.5)                                  | 3 (3.9)                                        | 3 (8.8)                                     | p = 0.298           |
| Chronic obstructive pulmonary disease         | -                 | 14 (12.7)                                | 7 (9.2)                                        | 7 (20.6)                                    | p = 0.098           |
| Asthma                                        | 1                 | 6 (5.5)                                  | 3 (3.9)                                        | 3 (8.8)                                     | p = 0.306           |
| Hypo- / Hyperthyroidism                       | 1                 | 12 (11.0)                                | 10 (13.2)                                      | 2 (5.9)                                     | p = 0.250           |
| Chronic renal insufficiency                   | -                 | 14 (12.7)                                | 8 (10.5)                                       | 6 (17.6)                                    | p = 0.300           |
| Chronic liver disease                         | -                 | 4 (3.6)                                  | 3 (3.9)                                        | 1 (2.9)                                     | p = 0.794           |
| Malignancy                                    | -                 | 12 (10.9)                                | 6 (7.9)                                        | 6 (17.6)                                    | p = 0.129           |
| <b>Symptoms</b>                               |                   |                                          |                                                |                                             |                     |
| Asymptomatic                                  | -                 | 12 (10.9)                                | 6 (7.9)                                        | 6 (17.6)                                    | p = 0.129           |
| Cough                                         | -                 | 74 (67.3)                                | 54 (71.1)                                      | 20 (58.8)                                   | p = 0.207           |
| Dyspnoea                                      | -                 | 53 (48.2)                                | 44 (57.9)                                      | 9 (26.5)                                    | <b>p = 0.002</b>    |
| Fever                                         | -                 | 61 (55.5)                                | 47 (61.8)                                      | 14 (41.2)                                   | <b>p = 0.044</b>    |
| Sore throat                                   | -                 | 11 (10.0)                                | 9 (11.8)                                       | 2 (5.9)                                     | p = 0.336           |
| Respiratory insufficiency                     | -                 | 54 (49.1)                                | 37 (48.7)                                      | 17 (50.0)                                   | p = 0.898           |
| Loss of smell or taste                        | 38                | 15 (20.8)                                | 12 (15.8)                                      | 3 (8.8)                                     | p = 0.929           |
| Fatigue                                       | -                 | 68 (61.8)                                | 50 (65.8)                                      | 18 (52.9)                                   | p = 0.200           |
| Vomiting                                      | -                 | 12 (10.9)                                | 9 (11.8)                                       | 3 (8.8)                                     | p = 0.639           |
| Rhinitis                                      | 1                 | 1 (0.9)                                  | 1 (1.3)                                        | 0 (0.0)                                     | p = 0.508           |
| Diarrhoea                                     | -                 | 14 (12.7)                                | 11 (14.5)                                      | 3 (8.8)                                     | p = 0.411           |
| <b>COVID-19 classification at admission †</b> |                   |                                          |                                                |                                             | <b>p = 0.622</b>    |
| Asymptomatic / mild                           | -                 | 15 (13.6)                                | 9 (11.8)                                       | 6 (17.6)                                    |                     |
| Moderate                                      | -                 | 52 (47.3)                                | 39 (51.3)                                      | 13 (38.2)                                   |                     |
| Severe                                        | -                 | 31 (28.2)                                | 20 (26.3)                                      | 11 (32.4)                                   |                     |
| Critical                                      | -                 | 12 (10.9)                                | 8 (10.5)                                       | 4 (11.8)                                    |                     |
| <b>Outcome</b>                                |                   |                                          |                                                |                                             | <b>p &lt; 0.001</b> |

|                                             |    |                     |                     |                     |                  |
|---------------------------------------------|----|---------------------|---------------------|---------------------|------------------|
| Uncomplicated                               | -  | 73 (66.4)           | 52 (68.4)           | 21 (61.8)           |                  |
| ICU                                         | -  | 26 (23.6)           | 24 (31.6)           | 2 (5.9)             |                  |
| Death                                       | -  | 11 (10.0)           | 0 (0.0)             | 11 (32.4)           |                  |
| <b>Clinical Characteristics</b>             |    |                     |                     |                     |                  |
| Total hospitalization (days)                | 1  | 12 (9.0-21.5)       | 12 (9.0-18.0)       | 14 (9.0-29.3)       | p = 0.198        |
| Invasive ventilation                        | -  | 5 (4.5)             | 1 (1.3)             | 4 (11.8)            | <b>p = 0.015</b> |
| <b>Clinical Parameter</b>                   |    |                     |                     |                     |                  |
| Hemoglobin (g/dL)                           | 76 | 13.8 (12.3-14.5)    | 13.8 (12.4-14.5)    | 13.4 (12.2-15.0)    | p = 105          |
| Red blood cell count (x10 <sup>12</sup> /L) | 76 | 4.6 (4.2-4.9)       | 4.6 (4.2-4.8)       | 4.5 (3.8-5.2)       | <b>p = 0.001</b> |
| Platelet count (x10 <sup>9</sup> /L)        | 76 | 190.0 (158.3-252.5) | 177.0 (143.3-249.8) | 230.5 (179.8-263.3) | p = 0.100        |
| Leukocyte count (x10 <sup>9</sup> /L)       | 75 | 5.5 (4.2-8.1)       | 5.5 (4.1-6.9)       | 7.2 (5.4-12.0)      | p = 0.146        |
| Lymphocyte count (x10 <sup>9</sup> /L)      | 80 | 0.8 (0.7-1.3)       | 0.9 (0.6-1.3)       | 0.8 (0.7-1.2)       | p = 0.113        |
| Neutrophil count (x10 <sup>9</sup> /L)      | 79 | 4.4 (3.3-5.3)       | 4.2 (3.1-5.1)       | 5.7 (3.8-10.2)      | <b>p = 0.001</b> |
| Monocyte count (x10 <sup>9</sup> /L)        | 80 | 0.3 (0.2-0.4)       | 0.3 (0.2-0.3)       | 0.4 (0.3-0.4)       | p = 0.989        |
| Eosinophil count (x10 <sup>9</sup> /L)      | 80 | 0.01 (0.0-0.01)     | 0.01 (0.01-0.01)    | 0.00 (0.00-0.01)    | <b>p = 0.005</b> |
| Basophil count (x10 <sup>9</sup> /L)        | 80 | 0.02 (0.01-0.03)    | 0.02 (0.01-0.03)    | 0.03 (0.01-0.05)    | p = 0.065        |
| C-reactive protein (mg/L)                   | 75 | 62.5 (38.8-108.8)   | 57.4 (32.4-99.0)    | 97.7 (60.4-115.5)   | p = 0.870        |
| D-dimer (mg/L)                              | 77 | 0.6 (0.4-0.9)       | 0.6 (0.4-0.9)       | 0.6 (0.5-0.9)       | p = 0.758        |
| Prothrombin time (%)                        | 77 | 101.6 (94.5-109.4)  | 102.8 (92.6-109.9)  | 98.0 (95.4-107.6)   | p = 0.741        |
| International normalized ratio              | 77 | 1.00 (1.00-1.04)    | 1.00 (1.00-1.05)    | 1.02 (1.00-1.03)    | p = 0.776        |
| Activated partial thromboplastin time (s)   | 77 | 35.1 (30.7-37.8)    | 35.2 (31.0-38.1)    | 35.1 (29.1-37.1)    | p = 0.364        |

\*p<0.05. Nominal variables were compared using the Chi-square test, metric data that were normally distributed were compared using the Student's T-Test and metric data that were not normally distributed were compared using the Mann Whitney U-Test. The Kolmogorov-Smirnov Test was applied to assess for normality.

† COVID-19 classification according to the guidelines issued by the World Health Organization in mild (fever <38°C, no dyspnoea, no pneumonia), moderate (fever, respiratory symptoms, pneumonia), severe (respiratory distress with respiratory rate ≥30 per minute, oxygen saturation < 93% at rest) and critical (respiratory failure with requirement of mechanical ventilation, requirement of ICU)

BMI: body mass index; ICU: intensive care unit; IQR: interquartile range.

**Supplementary Table S2: Antibodies for flow cytometry analyzes**

| <b>Antibody</b>     | <b>Fluorophore</b> | <b>Clone</b> | <b>Final<br/>concentration</b> | <b>Company</b> |
|---------------------|--------------------|--------------|--------------------------------|----------------|
| $\alpha$ -CD66b     | Pacific Blue       | G10F5        | 1:75                           | BioLegend      |
| $\alpha$ -CD14      | APC                | MØ9          | 1:60                           | BD Biosciences |
| $\alpha$ -CD16      | PE-Cyanine7        | 3G8          | 1:150                          | BioLegend      |
| $\alpha$ -CD11b-act | FITC               | CBRM1/5      | 1:60                           | BioLegend      |
